Long Covid: quantitative and qualitative analyses of online Long Haulers' experiences, emotions and practices in the UK

*Sam Martin and Esperanza Miyake*

### **WITHDRAWAL/DISCLAIMER STATEMENT**

The authors have withdrawn this manuscript because of issues that have been raised regarding the process of data collection. Therefore, the authors do not wish this work to be cited as reference for the project. If you have any questions, please contact the corresponding author.
